# Supplementary material for: A versatile strategy to fabricate MOFs/carbon material integrations and their derivatives for enhanced electrocatalysis
Source: Royal Society of Chemistry journal article supplement (doi:10.1039/c5ra21998a), 2016-01-01
Supplement: c5ra21998a1.pdf [file c5ra21998a1.pdf]

**9th August 2017 Update:** Please note that this version of the Supporting Information replaces the version that was originally published on 19<sup>th</sup> January 2016 and contains updated versions of Fig. S9 and Table S1, as described in the associated Correction Notice.

## Supporting Information:

# A Versatile Strategy to Fabricate MOFs/Carbon Materials Integrations and Their Derivatives for Enhanced Electrocatalysis

*Xiao Ma,<sup>a,b</sup> Xue Zhao,<sup>a,b</sup> Jian Sun,<sup>a</sup> Dehui Li,<sup>a,b</sup> and Xiurong Yang<sup>\*a</sup>*

## Experimental details

### *Preparation of ZC (means the hybrid of ZIF-8 and MWCNTs)*

Purified MWCNTs (0.17 g) were put in methanol (15 mL) followed by sonication for 10 min. Zn(NO<sub>3</sub>)<sub>2</sub>·6H<sub>2</sub>O (0.2231 g) and 2-MeIM (0.4926 g) were dissolved in above solution followed by transferring it into a 50 mL Teflon-lined stainless steel autoclave and crystallized for 24 h at 140 °C.<sup>1</sup> After cooling down to room temperature, the solution was filtered and rinsed with MeOH followed by drying in a vacuum oven overnight at 50 °C.

### *Preparation of ZC-900 (means the ZC pyrolyzed at 900 °C)*

The as-prepared ZC was put in a ceramic boat and then transferred it to a tube furnace for pyrolysis at 200 °C for 2 h and then 900 °C for 5 h under argon flow. Next, the resultant sample was immersed in H<sub>2</sub>SO<sub>4</sub> (1 M) with stirring for 24 h followed by washing and drying.<sup>2</sup>

Fig. S1~S11:

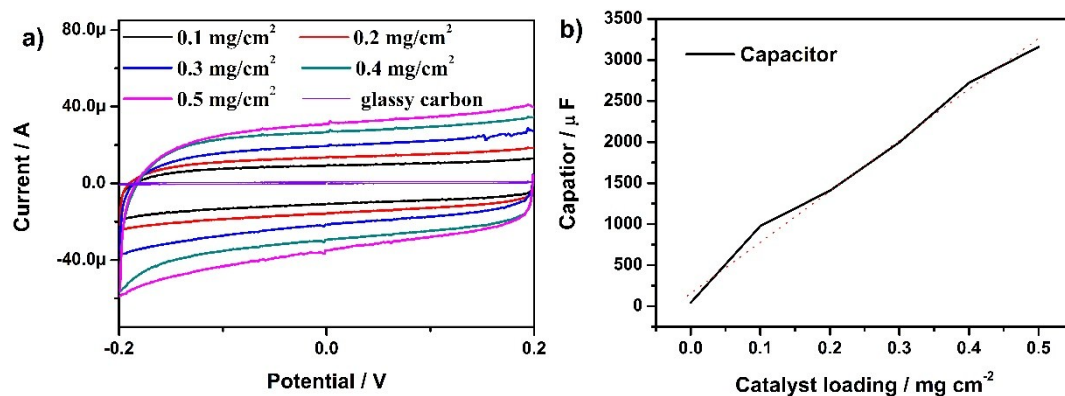

Figure S1 a) The measured CVs of different amounts of ZPC-1/1-900 on GCEs; b) The relationship between capacitors and loading amounts of ZPC-1/1-900. (Scan rate: 10 mV s<sup>-1</sup>, electrolyte: 0.1 M KOH)

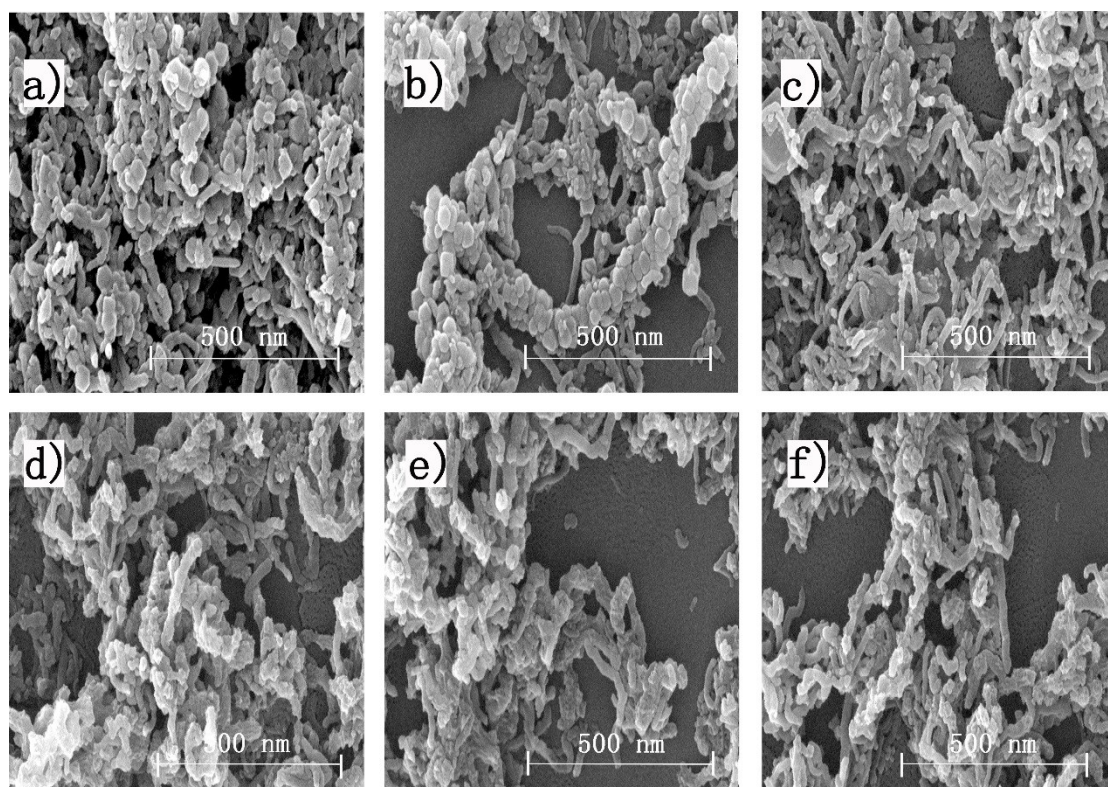

Fig. S2 SEM images of a) ZPC-0.5/1, b) ZPC-1/1, c) ZPC-2/1, d) ZPC-0.5/1-900, e) ZPC-1/1-900 and f) ZPC-2/1-900.

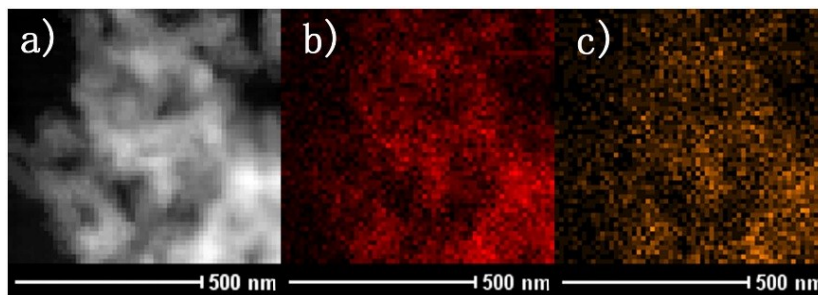

**Fig. S3** a) HAADF-STEM image of ZPC-1/1-900; b) corresponding C elemental mapping image; c) corresponding N elemental mapping image.

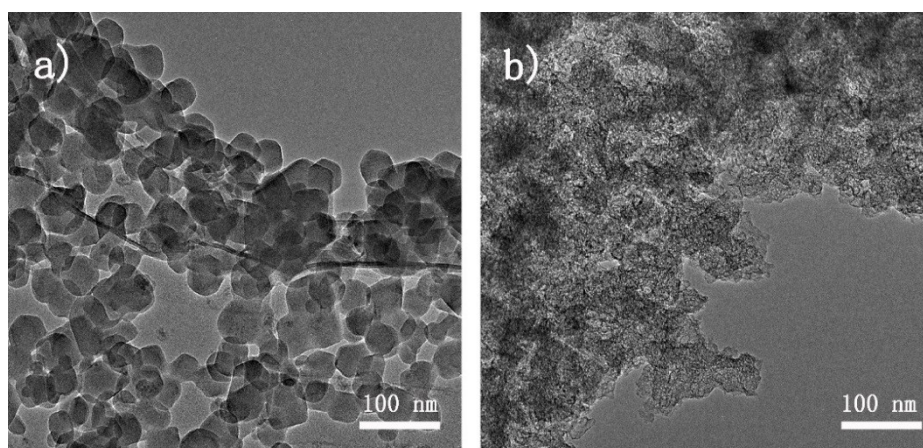

**Fig. S4** TEM images of a) pure ZIF-8 and b) ZIF-8-900.

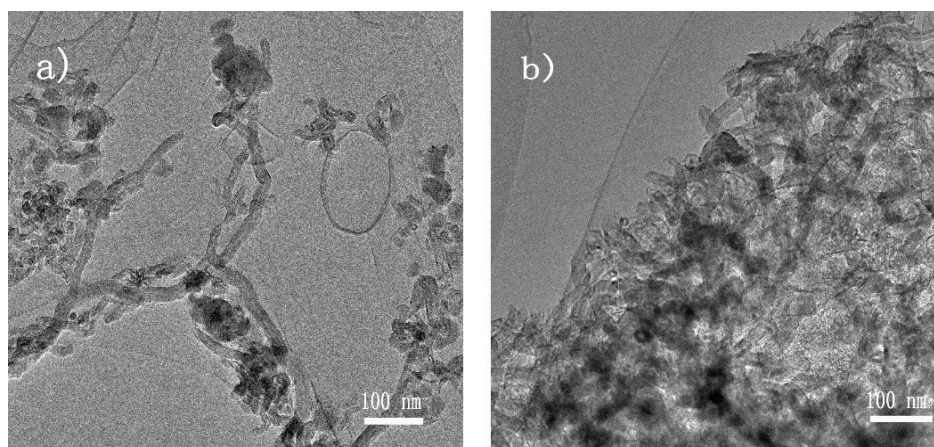

**Fig. S5** TEM images of a) ZC and b) ZC-900.

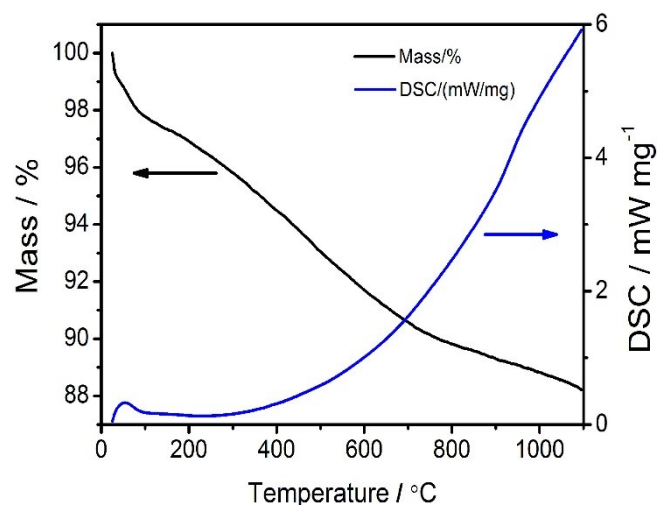

**Fig. S6** TGA and DSC curves of MWCNTs-PDA.

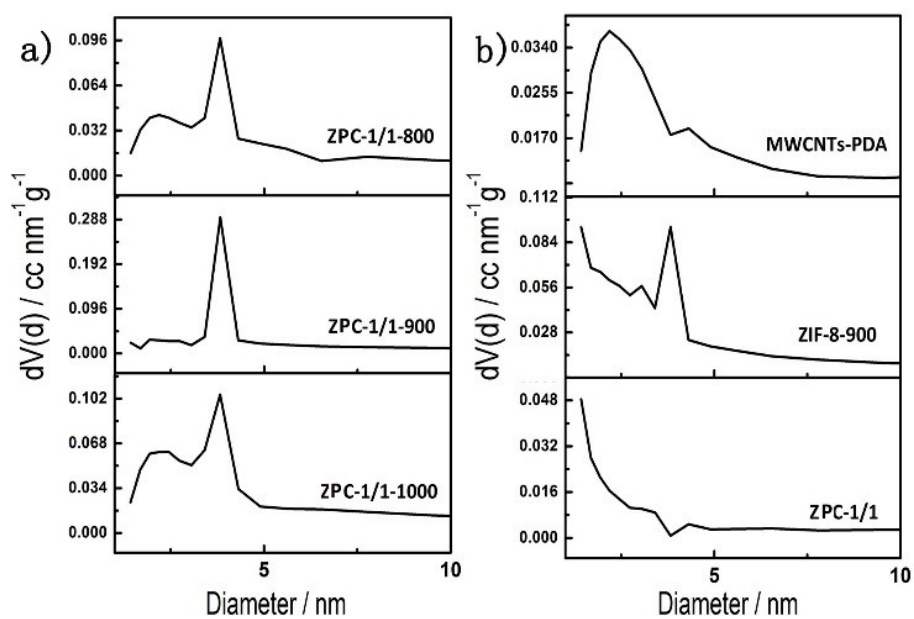

**Fig. S7** PSD data of ZPC-1/1-800, ZPC-1/1-900, ZPC-1/1-1000, MWCNTs-PDA, ZIF-8-900 and ZPC-1/1 respectively.

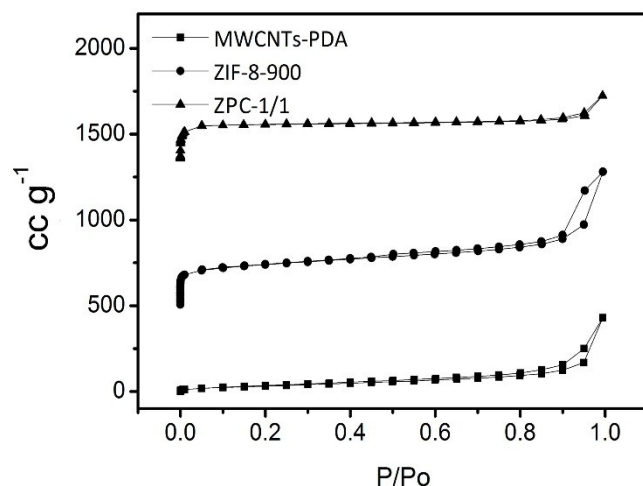

**Fig. S8** Nitrogen adsorption/desorption isotherms of MWCNTs-PDA, ZIF-8-900 and ZPC-1/1.

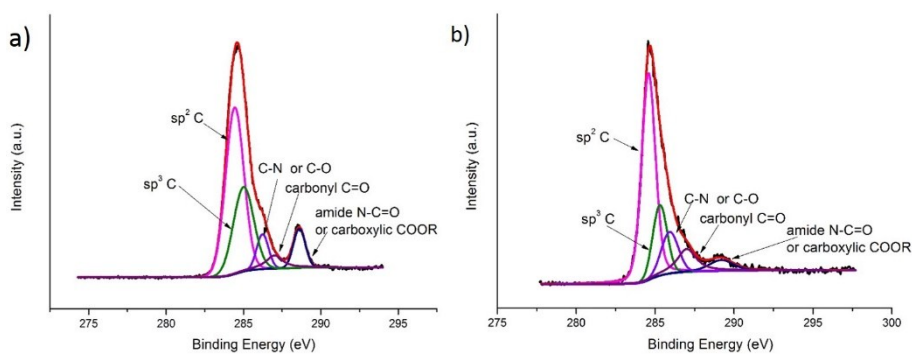

**Fig. S9** High-resolution C 1s spectra of a) ZIF-8-900 and b) ZPC-1/1-900.

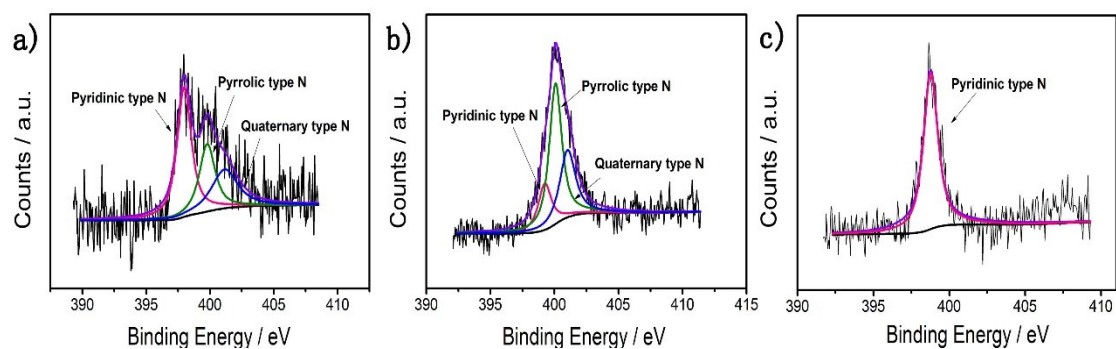

**Fig. S10** High-resolution N 1s spectra of a) ZIF-8-900, b) MWCNTs-PDA and c) ZPC-1/1.

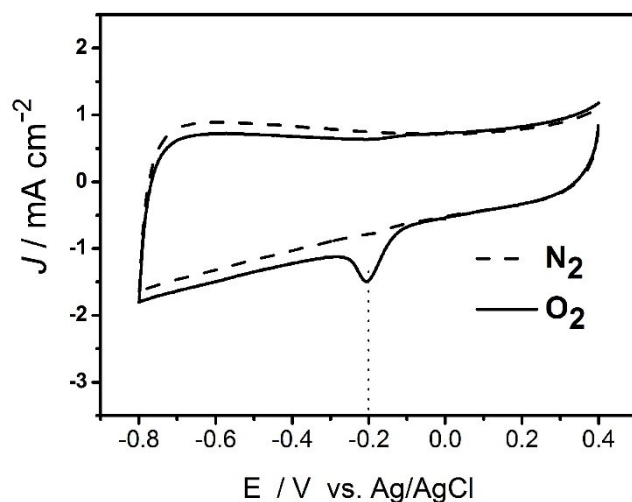

**Fig. S11** CV curves of ZPC-1/1-900 in  $N_2$  and  $O_2$ -saturated KOH (0.1 M). The scan rate is  $100 \text{ mV s}^{-1}$ .

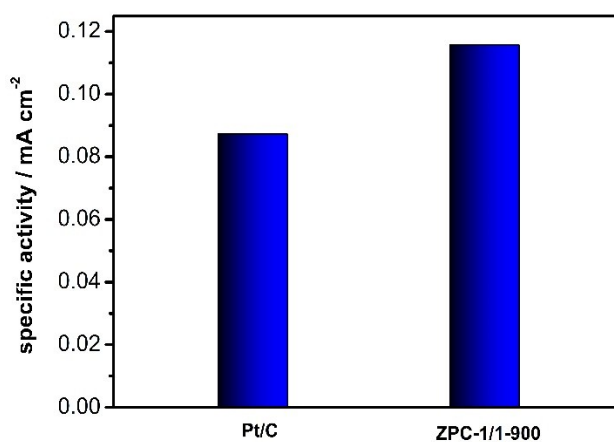

**Fig. S12** The specific activities of commercial Pt/C and ZPC-1/1-900 at  $-0.164 \text{ V}$  (vs. Ag/AgCl, saturated KCl, reference electrode).

**Table S1.** The content of different types of N and C

| catalyst     | N1   | N2   | N3   | N(total) | C1    | C2    | C3    | C4   | C5   | C(total) |
|--------------|------|------|------|----------|-------|-------|-------|------|------|----------|
| ZPC-1/1-800  | 2.89 | 1.02 | 1.05 | 4.96     | 43.15 | 26.29 | 4.54  | 5.74 | 4.22 | 83.94    |
| ZPC-1/1-900  | 1.61 | 0.97 | 1.40 | 3.98     | 48.58 | 15.70 | 11.01 | 9.66 | 4.75 | 89.7     |
| ZPC-1/1-1000 | 0.68 | 0.50 | 0.53 | 1.7      | 35.40 | 27.54 | 13.95 | 9.01 | 6.20 | 92.09    |

Note: N1: pyridinic-N, N2: pyrrolic-N and N3: quaternary-N; C1:  $sp^2$  C, C2:  $sp^3$  C, C3: C-N or C-O, C4: carbonyl C=O and C5: amide N-C=O or carboxylic COOR.

**Table S2.** Summary of the metal-free porous doped carbon electrocatalysts reported in correlative literatures.

| electrocatalyst                        | Electron transfer number | Half-potential | Reference    |
|----------------------------------------|--------------------------|----------------|--------------|
| ZPC-1/1-900                            | 3.8                      | 0.774 V        | Present work |
| N3B3-900                               | 3.3                      | 0.674 V        | S3           |
| NC900                                  | 3.3                      | 0.680 V        | S4           |
| Carbon-L                               | 3.7                      | 0.697 V        | S5           |
| NGPC-1000-10                           | 3.8                      | 0.764 V        | S6           |
| N,S-GN                                 | 3.1                      | 0.614 V        | S7           |
| N,S-mesoporous GN                      | 3.6                      | 0.664 V        | S8           |
| PC-Al-1000                             | 3.4                      | 0.704 V        | S9           |
| <i>N-doped carbon nanocages</i>        | 3.3                      | 0.704 V        | S10          |
| g-C <sub>3</sub> N <sub>4</sub> @CMK-3 | 4.0                      | 0.729 V        | S11          |

Note: All potentials are versus to reversible hydrogen electrode (RHE) based on the standard calculation method: in 0.1 M KOH solution (pH = 13),  $E(\text{RHE}) = E(\text{Ag}/\text{AgCl}) + 0.964$ ,  $E(\text{RHE}) = E(\text{Hg}/\text{HgO}) + 0.932$

### Notes and references

<sup>a</sup>State Key Laboratory of Electroanalytical Chemistry, Changchun Institute of Applied Chemistry, Chinese Academy of Sciences, Changchun 130022, Jilin, China.

E-mail: xryang@ciac.ac.cn

<sup>b</sup>University of the Chinese Academy of Sciences, Beijing 100049, China.

1. K. S. Park, Z. Ni, A. P. Cote, J. Y. Choi, R. Huang, F. J. Uribe-Romo, H. K. Chae, M. O'Keeffe and O. M. Yaghi, *P. Natl. Acad. Sci. USA*, 2006, **103**, 10186-10191.
2. W. Zhang, Z.-Y. Wu, H.-L. Jiang and S.-H. Yu, *J. Am. Chem. Soc.*, 2014, **136**, 14385-14388.
3. S. Wohlgemuth, T. Fellingner, P. Jaker and M. Antonietti, *J. Mater. Chem. A*, 2013, **1**, 4002-4009.
4. A. Aijaz; N. Fujiwara and Q. Xu, *J. Am. Chem. Soc.*, 2014, **136**, 6790-6793.
5. P. Zhang, F. Sun, Z. Xiang; Z. Shen, J. Yun, and D. Cao, *Energy Environ. Sci.*, 2014, **7**, 442-450.

6. L. J. Zhang, Z. X. Su, F. L. Jiang, L. L. Yang, J. J. Qian, Y. F. Zhou, W. M. Li and M. C. Hong, *Nanoscale*, 2014, **6**, 6590-6602.
7. W. Ai, Z. Luo, J. Jiang, J. Zhu, Z. Du, Z. Fan, L. Xie, H. Zhang, W. Huang, and T. Yu, *Adv. Mater.* 2014, **26**, 6186–6192.
8. J. Liang, Y. Jiao, M. Jaroniec, S.-Z. Qiao, *Angew. Chem. Int. Ed.* 2012, **51**, 11496-11500.
9. X. Zhao, H. Zhao, T. Zhang, X. Yan, Y. Yuan, H. Zhang, H. Zhao, D. Zhang, G. Zhu and X. Yao, *J. Mater. Chem. A*, 2014, **2**, 11666-11671.
10. S. Chen, J. Bi, Y. Zhao, L. Yang, C. Zhang, Y. Ma, Q. Wu, X. Wang and Z. Hu, *Adv. Mater.* 2012, **24**, 5593-5597.
11. Y. Zheng, Y. Jiao, J. Chen, J. Liu, J. Liang, A. Du, W. Zhang, Z. Zhu, S. C. Smith, M. Jaroniec, G. Q. Lu, and S. Qiao, *J. Am. Chem. Soc.* 2011, **133**, 20116–20119.
